# Supplementary material
Source: PubMed Central journal article supplement (PMC9878432)
Supplement: jamadermatol-e226051-s002.pdf [file jamadermatol-e226051-s002.pdf]

## Data Sharing Statement

Zhao. Association of Lipid-Lowering Drugs With Risk of Psoriasis. *JAMA Dermatol*. Published January 25, 2023. doi:10.1001/jamadermatol.2022.6051

### Data

**Data available:** Yes

**Data types:** Other (please specify)

**Additional Information:** GWAS summary statistics

**How to access data:** Summary statistics for the psoriasis GWAS will be submitted to the GWAS catalog (<https://www.ebi.ac.uk/gwas/>).

**When available:** With publication

### Supporting Documents

**Document types:** None

### Additional Information

**Who can access the data:** anyone requesting the data

**Types of analyses:** any purpose

**Mechanisms of data availability:** Summary statistics for the psoriasis GWAS will be submitted to the GWAS catalog (<https://www.ebi.ac.uk/gwas/>).
